# Supplementary material for: Attractor Concepts to Evaluate the Transcriptome-wide Dynamics Guiding Anaerobic to Aerobic State Transition in Escherichia coli
Source: PubMed Central journal article supplement (PMC7125300; doi:10.1038/s41598-020-62804-3), 2020-04-03
Supplement: 41598_2020_62804_MOESM1_ESM.pdf [file 41598_2020_62804_MOESM1_ESM.pdf]

## Supplementary Figures and Tables

### Attractor Concepts to Evaluate the Transcriptome-wide Dynamics Guiding Anaerobic to Aerobic State Transition in *Escherichia coli*

Thuy Tien Bui<sup>1</sup> and Kumar Selvarajoo<sup>1,2\*</sup>

<sup>1</sup>Singapore Institute of Food and Biotechnology Innovation (SIFBI), Agency for Science, Technology and Research A\*STAR, Proteos, 61 Biopolis Drive, Singapore 138673, Singapore.

<sup>2</sup>Synthetic Biology for Clinical and Technological Innovation (SynCTI), National University of Singapore, 28 Medical Drive, Singapore 117456, Singapore

\*Corresponding author email: [kumar\\_selvarajoo@biotrans.a-star.edu.sg](mailto:kumar_selvarajoo@biotrans.a-star.edu.sg)

#### Supplemental figure legend

**Figure S1. Comparison transcriptome-wide data with statistical distributions for all three replicates (denoted as sample a, b, and c) at all time (0, 0.5, 1, 2, 5, 10 minutes).** (A) Cumulative distribution functions versus TPM in logscale, and (B) Quantile-quantile plot between transcriptome data (experimental data – black colour) and lognormal (red), Pareto (light green), Burr (cyan), loglogistic (blue), Weibull (purple), and gamma (grey) statistical distributions.

**Figure S2. Transcriptome-wide correlation in time.** (A) Spearman correlation and (B) Biweight midcorrelation (see Methods) between time  $t_i$  (0, 0.5, 1, 2, 5, 10 min) and  $t_0$  (0 min) of all 3 replicates (replicate a – red, replicate b – green, replicate c - blue) across all 3391 genes with expression above 5 TPM (left panel), and across 3389 genes (2 highest expressed genes, *rnpB* and *lpp*, were removed – right panel). Smooth decreasing trend with time is observed for all correlation metrics used.

**Figure S3. Properties of attractor and non-attractor genes.** (A) Distribution and (B) Standard deviations of  $R_v$  (top panel) and  $MI_v$  (bottom panel) with different genome element size (denoted as  $n$ ) of all replicates (denoted as sample a, b, and c) at time  $t = 0.5, 1, 2, 5, 10$  minutes. Standard deviation of  $R_v$  and  $MI_v$  decreases as  $n$  increases, following the law of large number (black). (C) Euclidian distance (the summed difference across all time points) of 100-gene transcriptomic elements compared with whole transcriptome trajectory. The elements are categorized into 4 types: falling above attractor region

(empty triangle symbol), falling into attractor region (black filled circle symbol), falling out of attractor region but having close distance to whole transcriptome trajectory (*pseudo-attractor* - empty circle symbol), and falling out of attractor region (*non-attractor* – empty square symbol). **(C)** Trajectories of elements falling above and into attractor (500 genes – black), *pseudo-attractor* elements (1300 genes - green), and *non-attractor* elements (1589 genes - blue) overlaid on SPD of whole transcriptome  $R_v$  and  $MI_v$ . Trajectory for each of the three sets of gene was generated by averaging 100 trajectories of 100 randomly chosen genes from the respective pool of genes. **(D)**. Kernel density of expression level for *attractor* (red), and *non-attractor* (green) sets of gene at time  $t = 0, 0.5, 1, 2, 5, 10$  minutes. Kernel density was estimated on the averaged expression of 3 replicates.

**Figure S4. Trajectory of genome elements with element size  $n = 100$  genes overlaid on superimposition of probability distribution (SPD) of whole-genome.**  $R_v$  and  $MI_v$  values of each 100-gene element at time  $t = 0, 0.5, 1, 2, 5, 10$  minutes formed their trajectory, with the transcriptomic elements sorted by **(A)** standard deviation of individual gene expression in the whole transcriptome (3389 genes) across 6 time points, giving 34 elements and **(B)** maximum fold-change of individual gene expression across all time points. Note that trajectory for each set of gene was obtained by averaging the corresponding trajectories of 3 replicates.

**Figure S5. Attractor and non-attractor genes trajectory on PC space and their temporal correlation** **(A)** Proportion of variance explained by the first 6 principal components in *whole transcriptome* (top left panel), *attractor* (top right panel), *pseudo-attractor* (bottom left panel), and *non-attractor* (bottom right panel) sets of gene. PC1 and PC2 account for more than 70% variance. **(B)** Temporal correlation of *whole transcriptome* (black), *attractor* (red), *collective non-attractor* (blue) and *no response* (brown) genes using Pearson (top left panel), Spearman (top right panel), Biweight midcorrelation (bottom left panel) and Mutual Information-based (bottom right panel) correlation metrics. Removing 68 *no response* genes from the 1589 *non-attractor* genes did not affect the *non-attractor* trajectory and temporal correlation profile.

**Figure S6. Properties of genes with two-fold expression change in comparison with attractor genes** **(A) – (B)** Major gene expression patterns of 631 *2-fold change* genes. **(A)**: Hierarchical clustering of *attractor* genes reveals 12 clusters of temporal expression profiles. **(B)** Five temporal average expression profile constructed by regrouping the 12 clusters: Group A: Gradual decay; Group B: Gradual activation; Group C: Fast activation, followed by decay and re-activation; Group D: Early activation, followed by decay; Group E: Early decay, followed by activation. **(C)** Kernel density of expression level for *attractor* (red), and *2-fold change* (blue) sets of gene at time  $t = 0, 0.5, 1, 2, 5, 10$  minutes. Kernel density was estimated on the averaged expression of 3 replicates.

Figure S1A

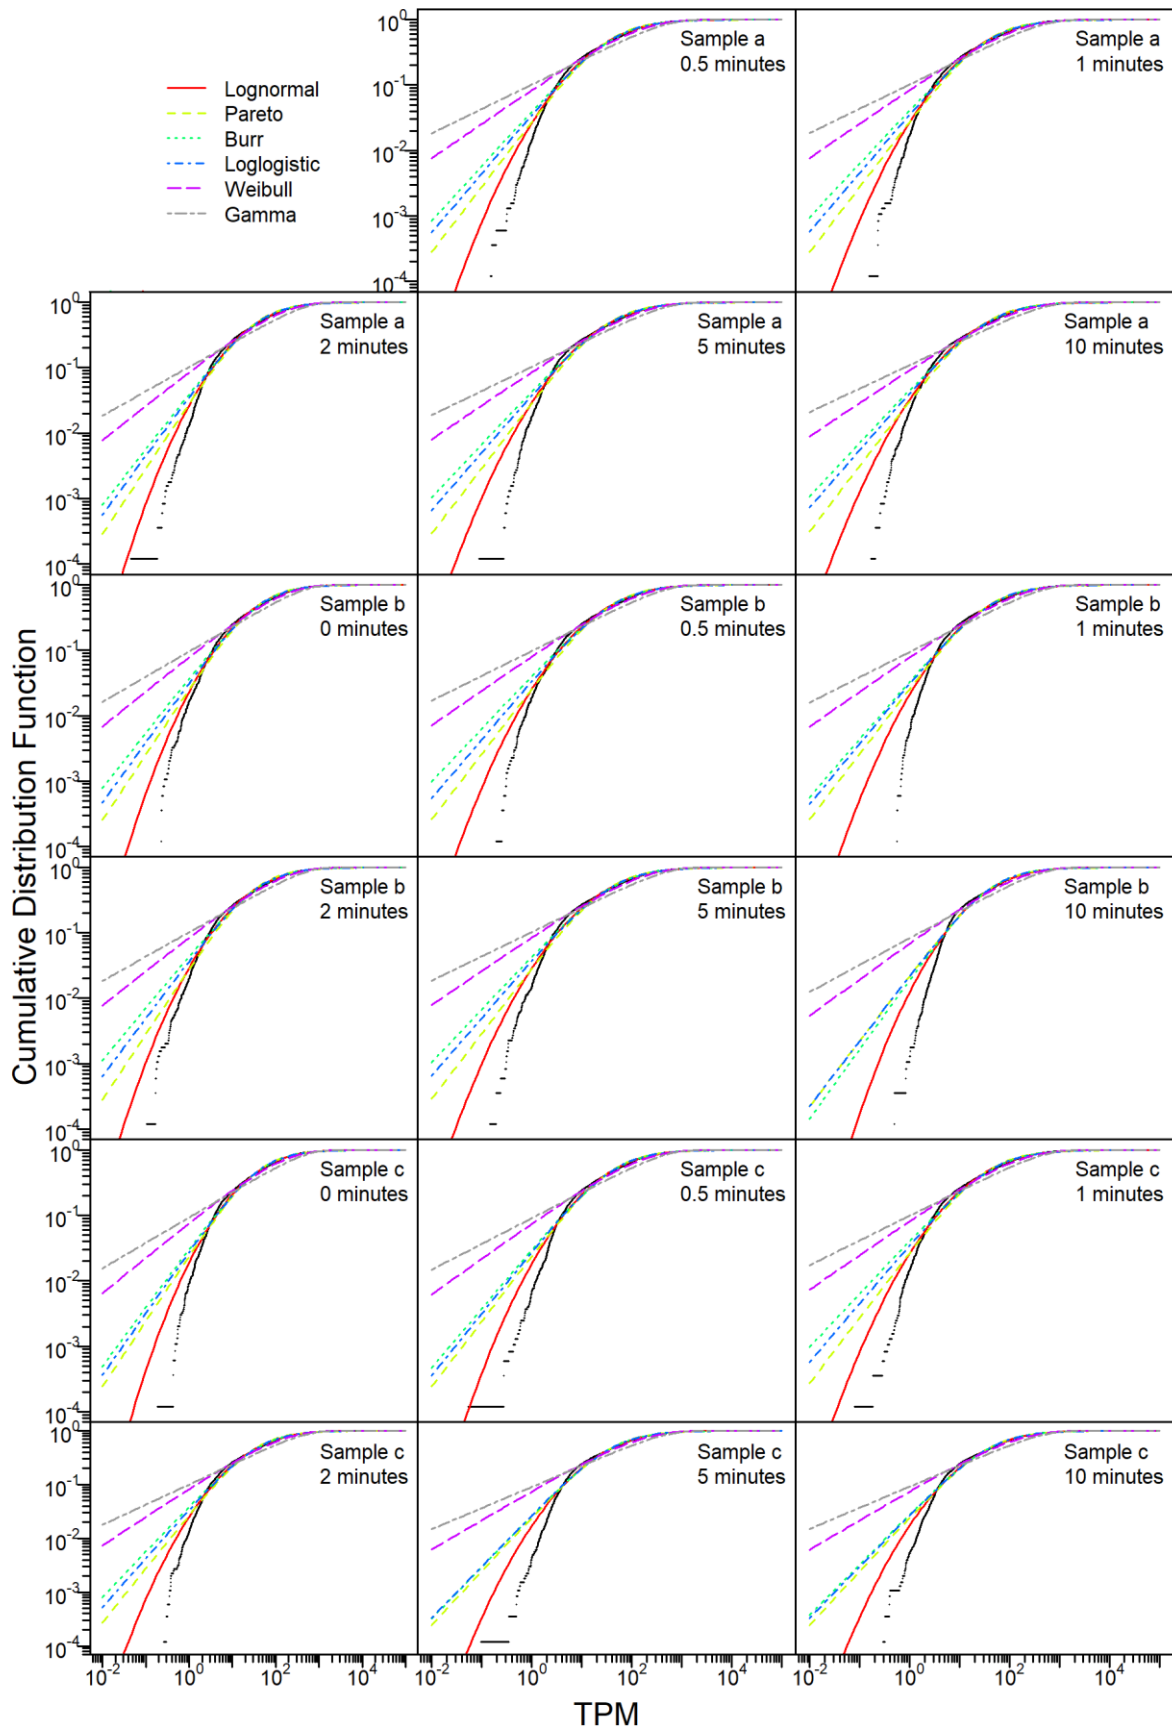

Figure S1B

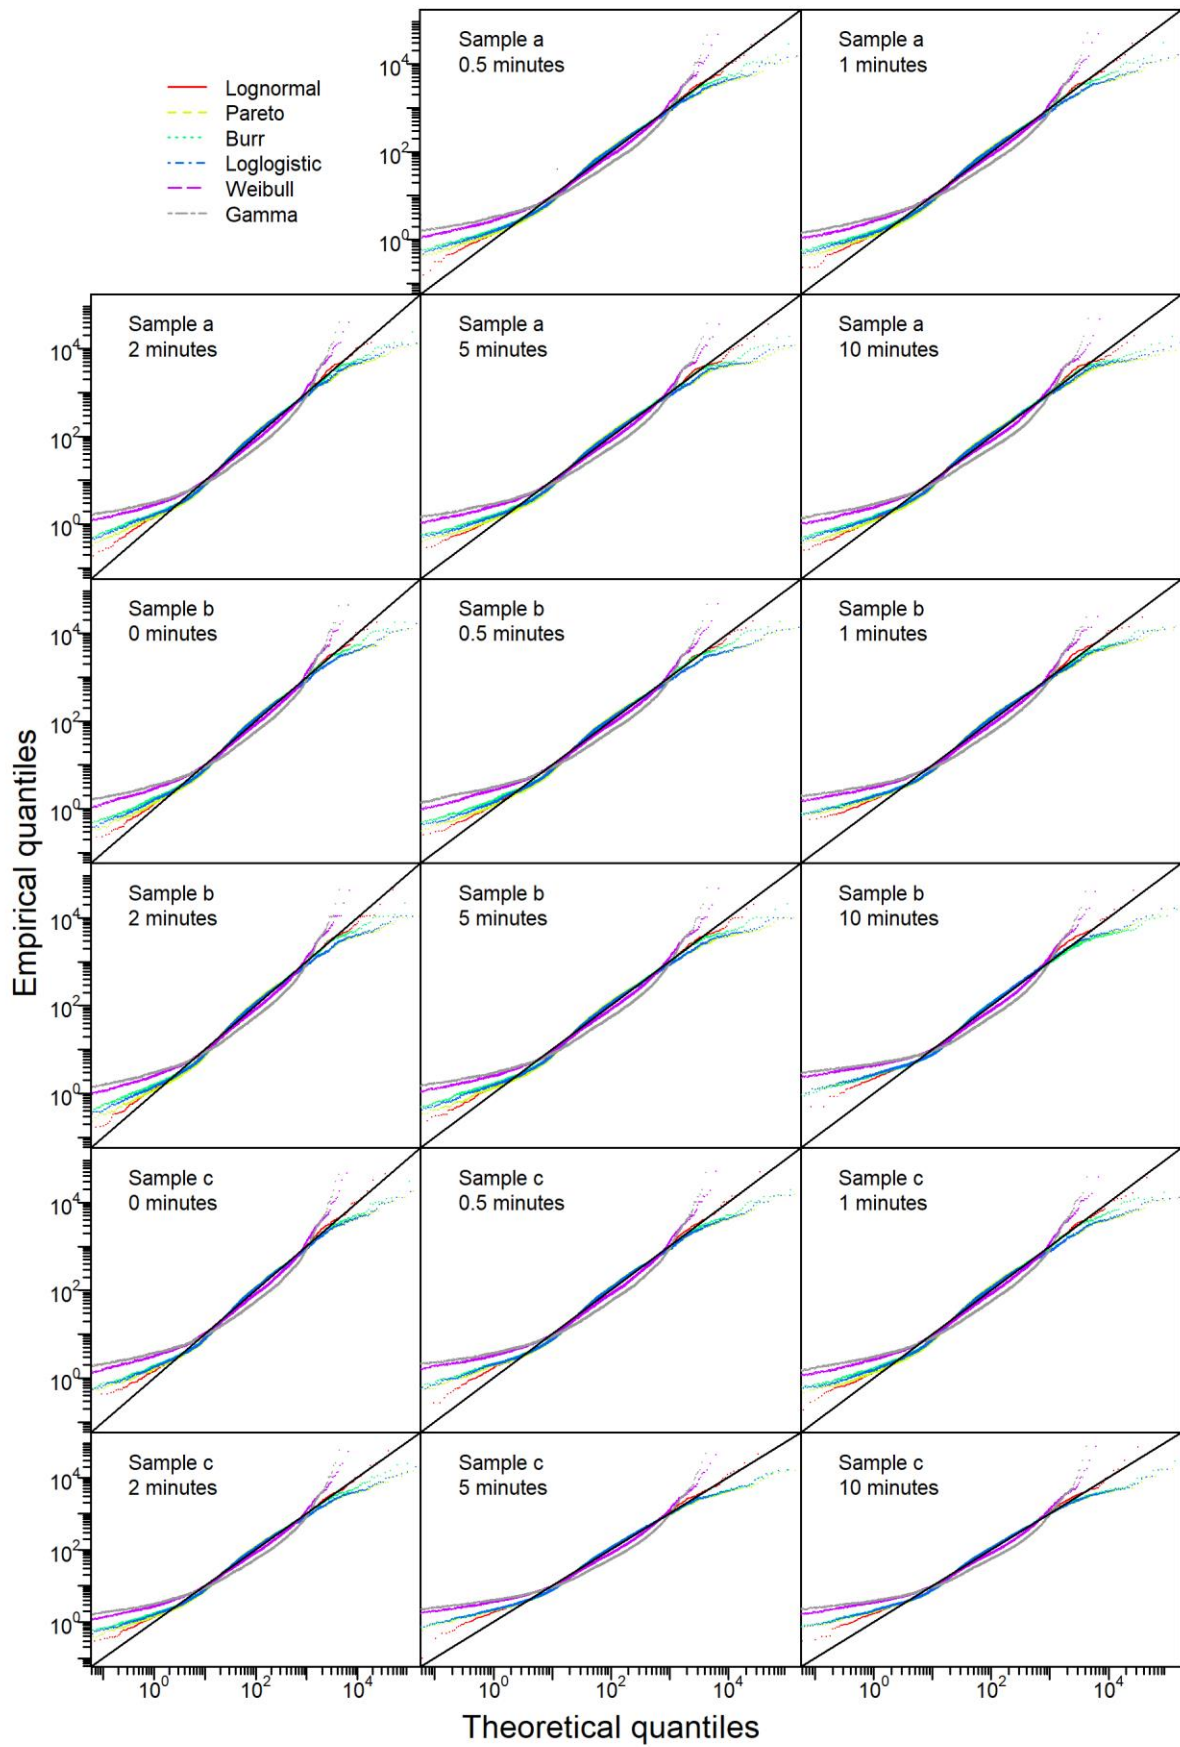

Figure S2

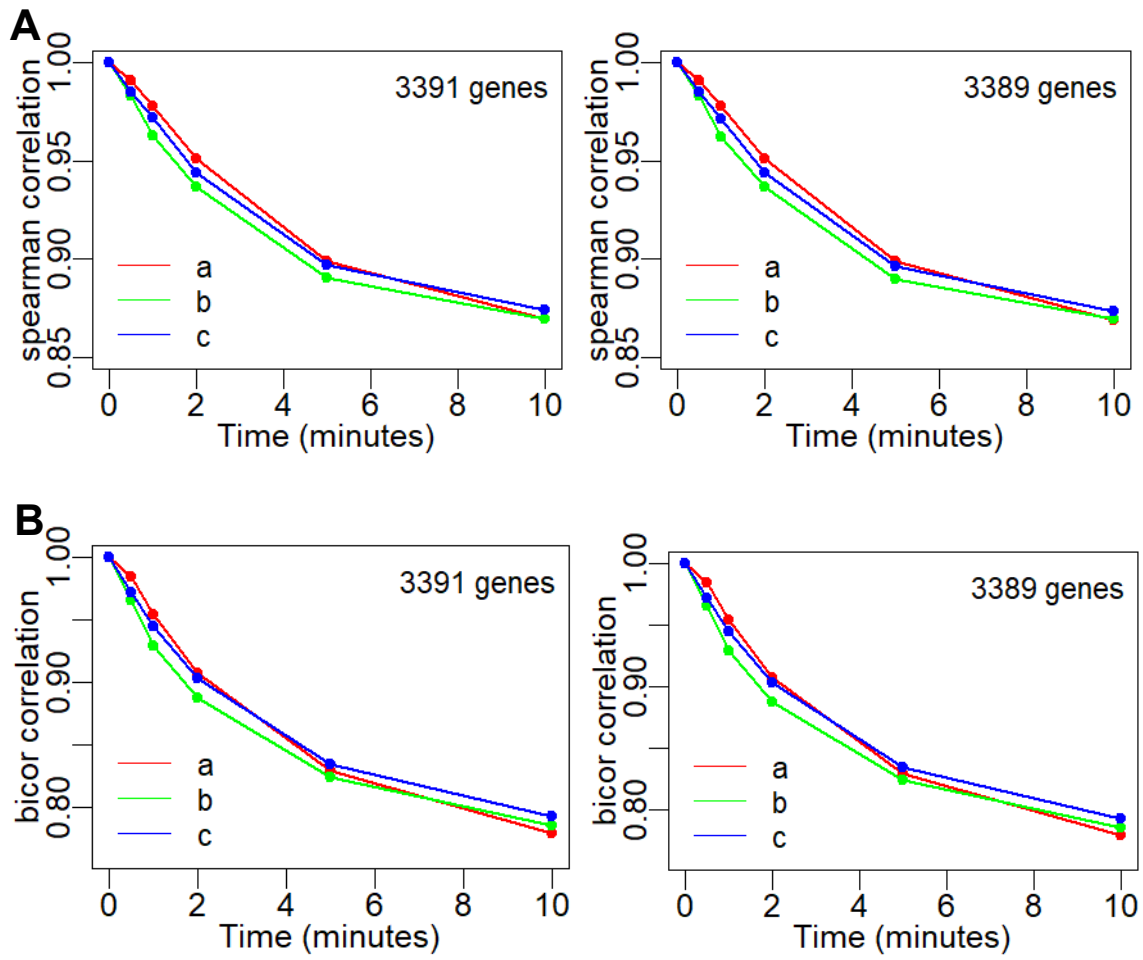

Figure S3A

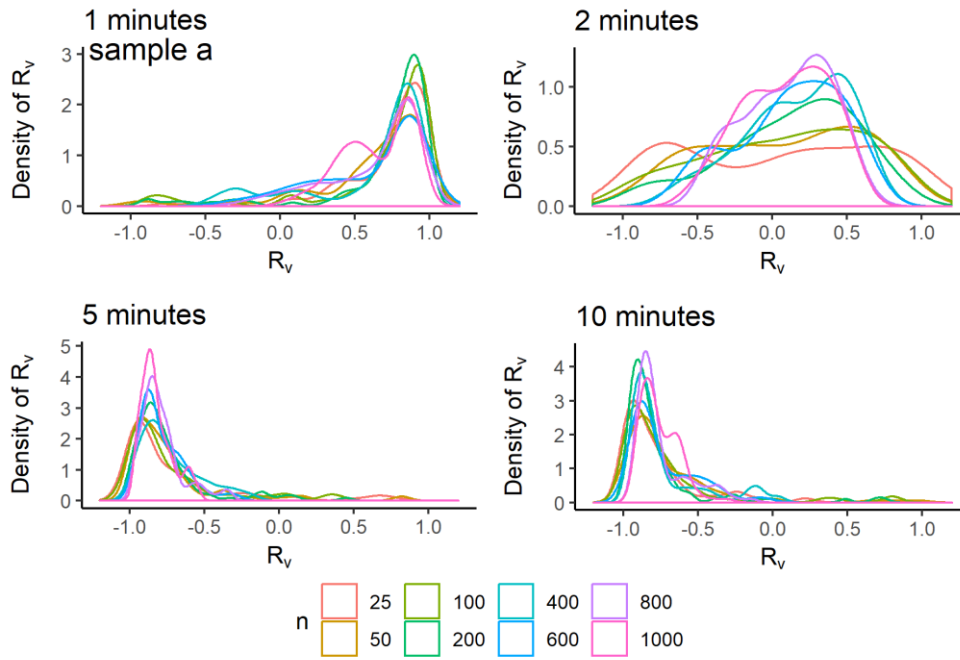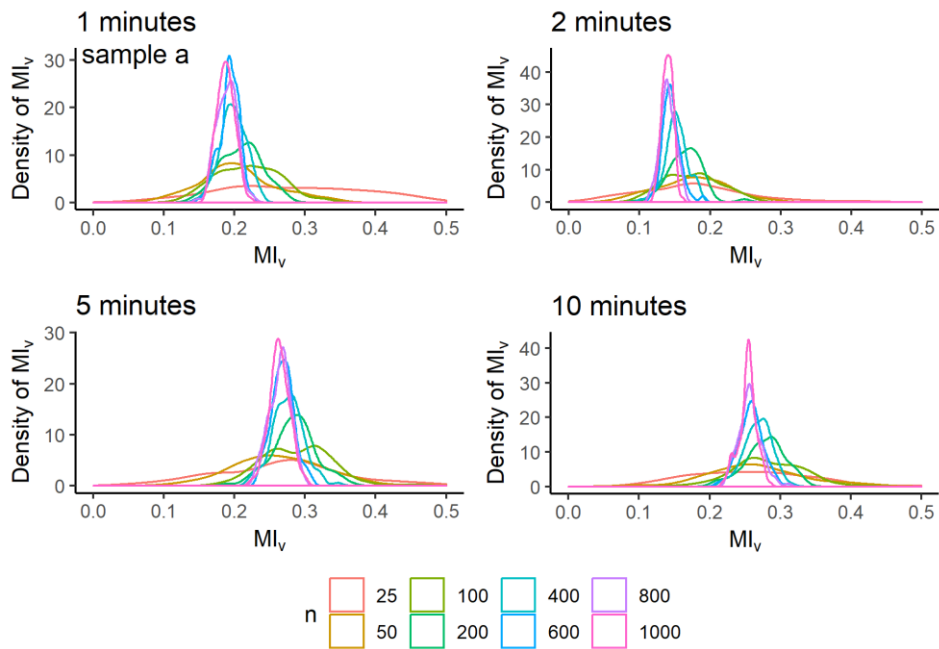

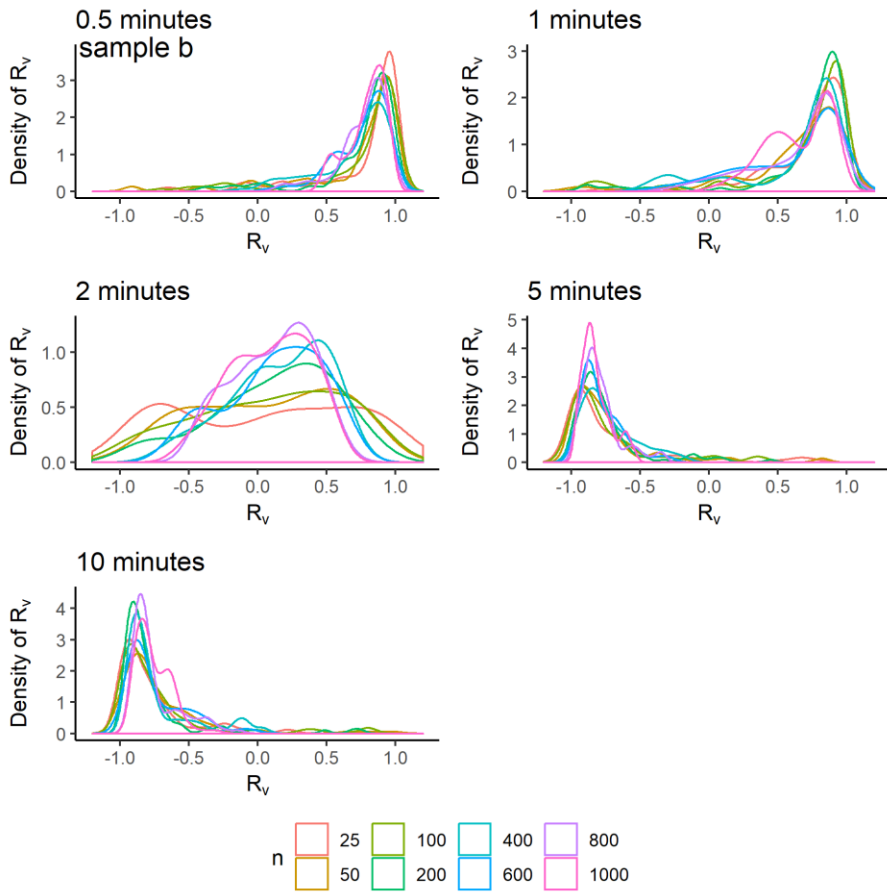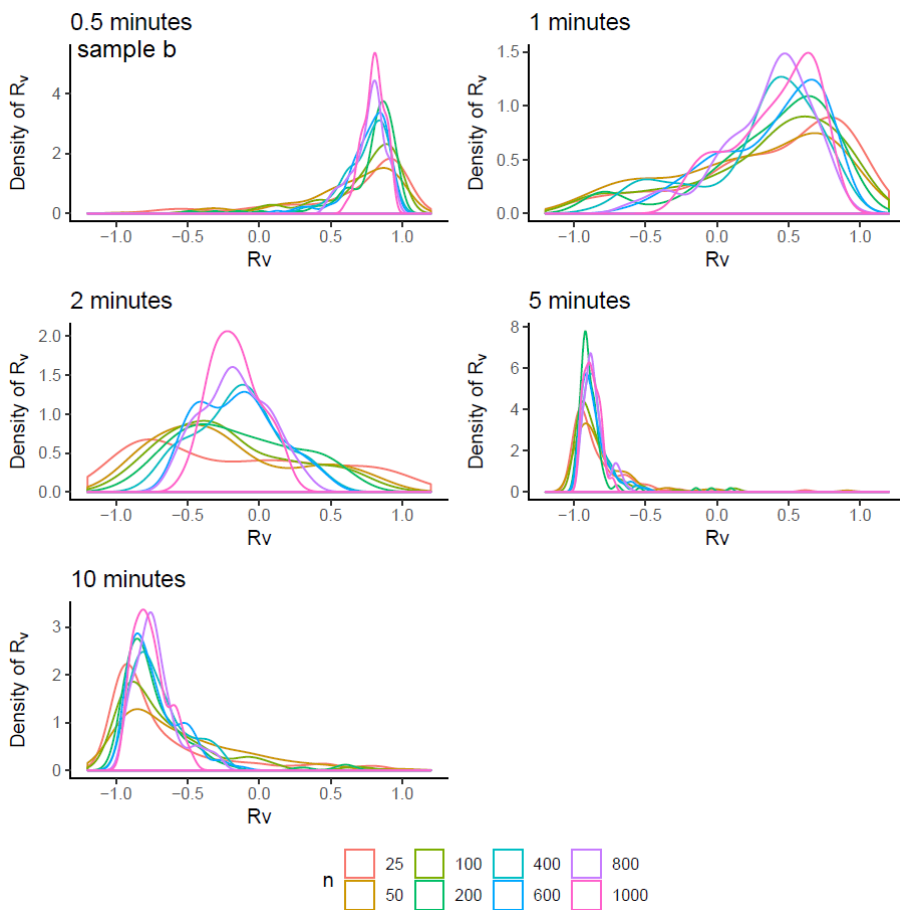

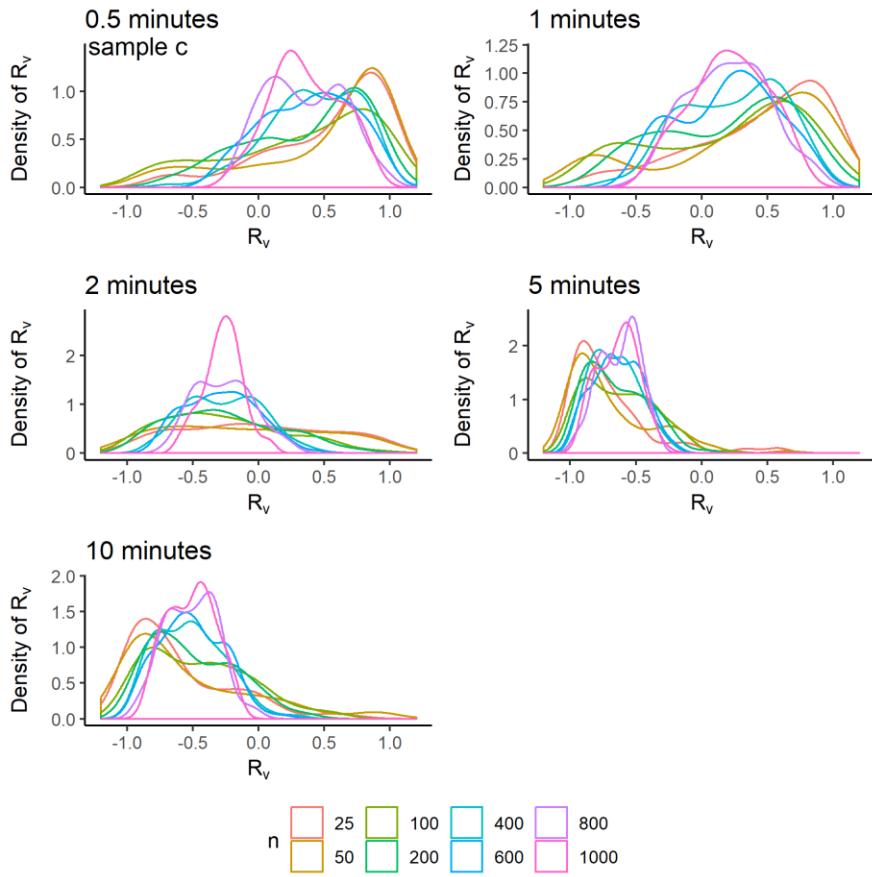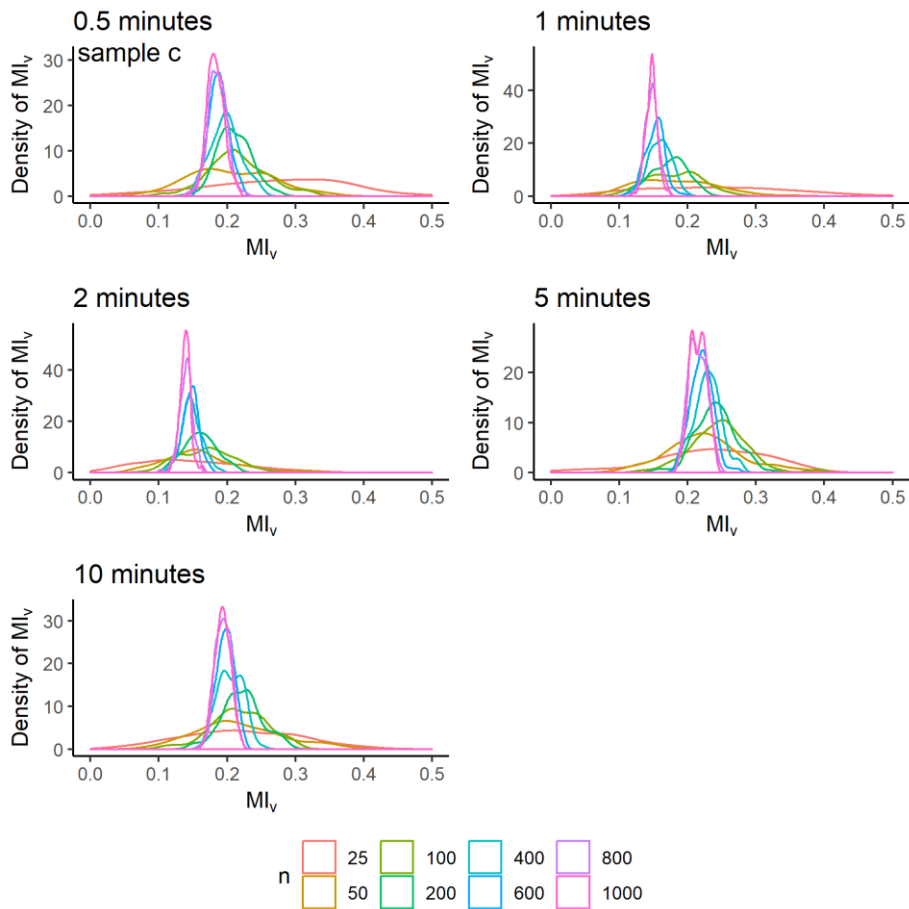



Figure S3B

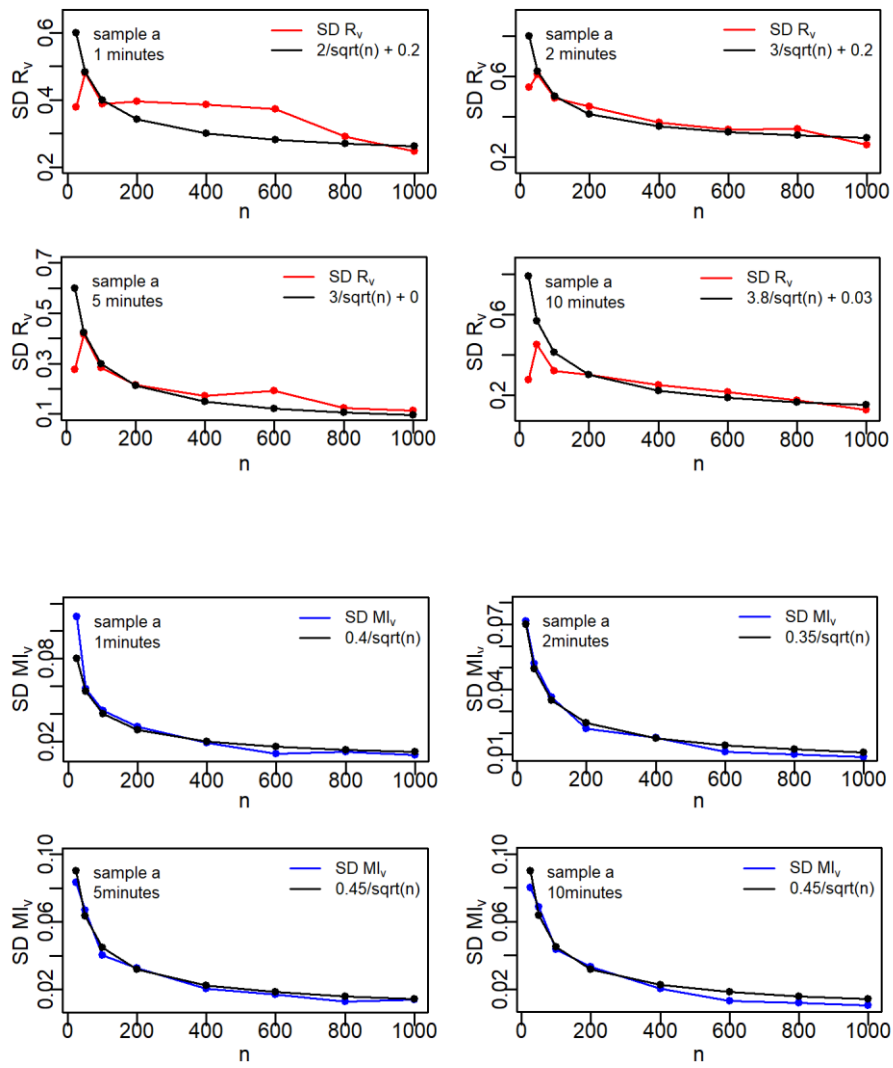

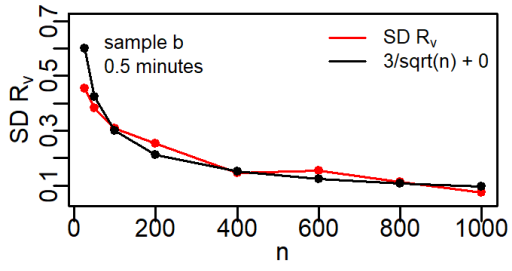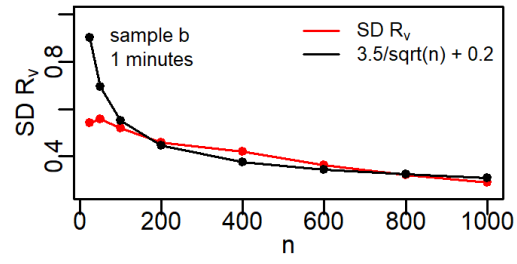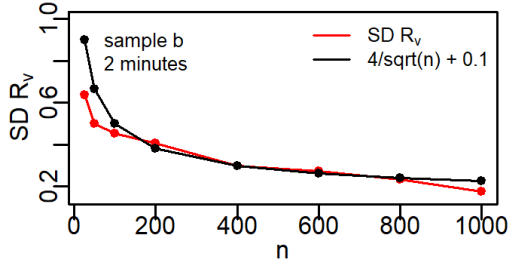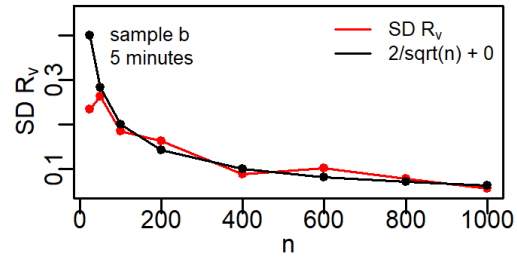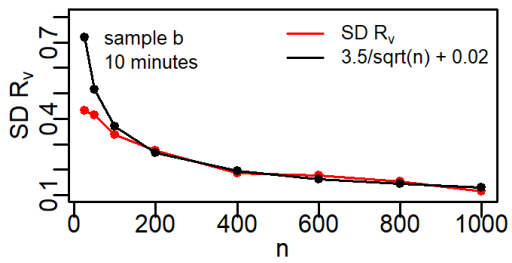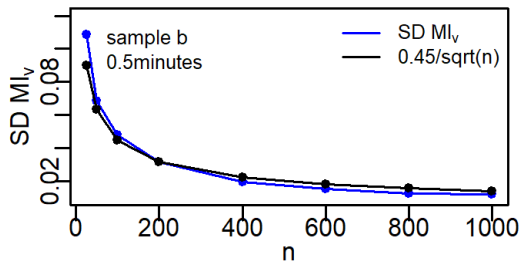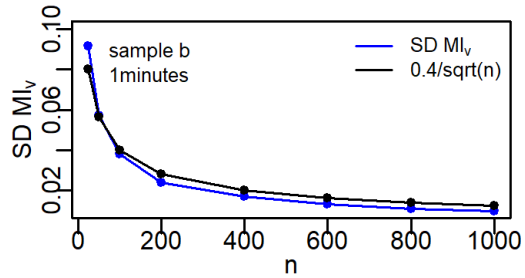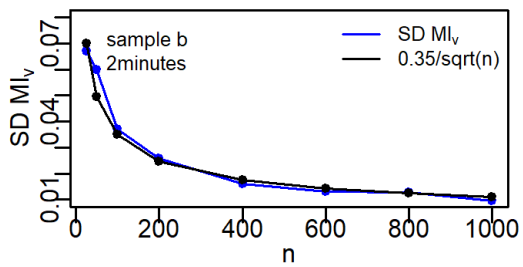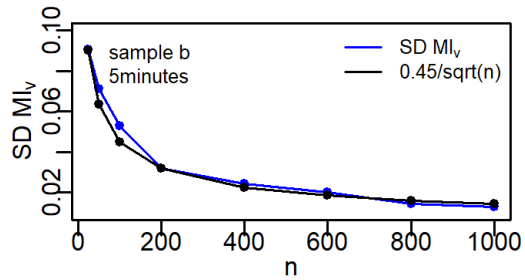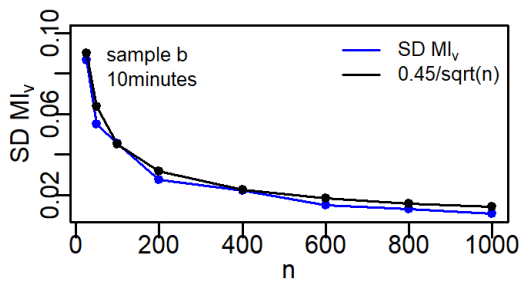

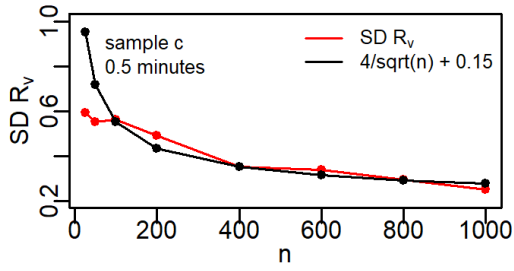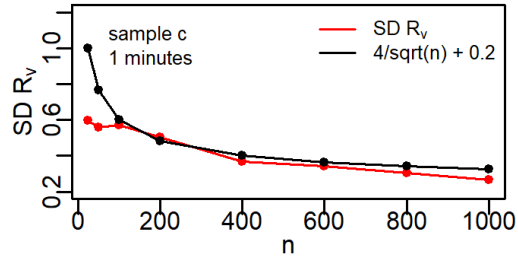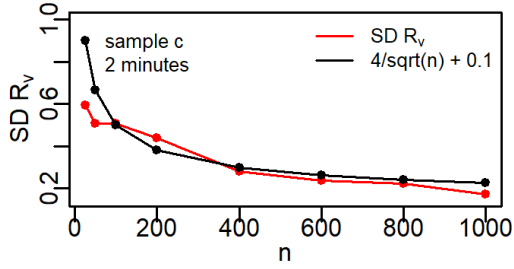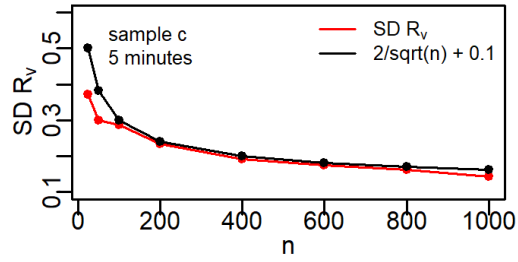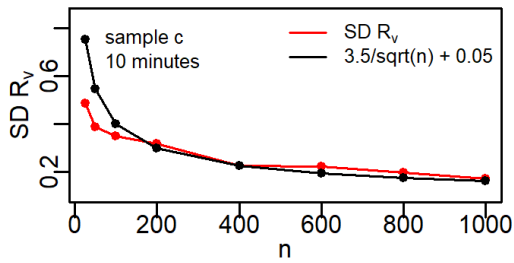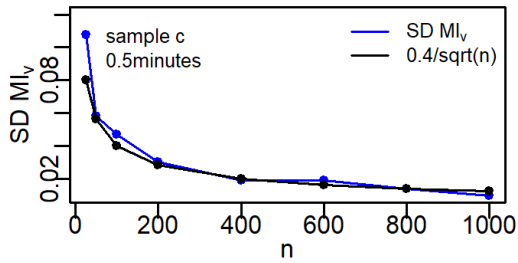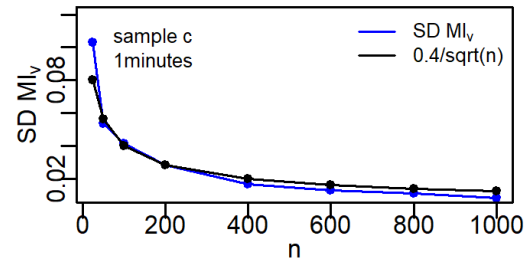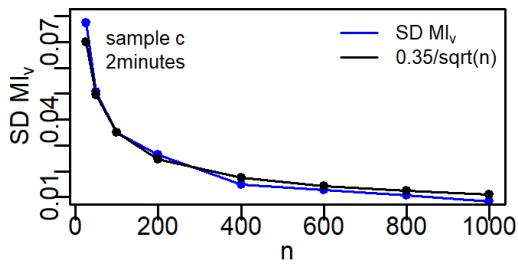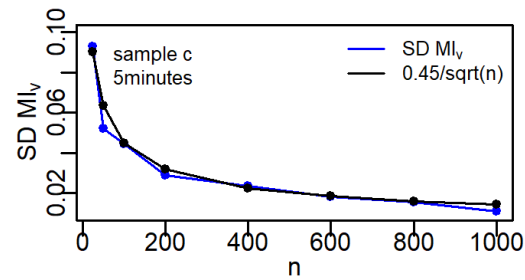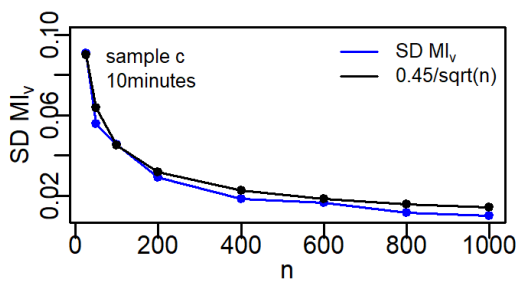

Figure S3C

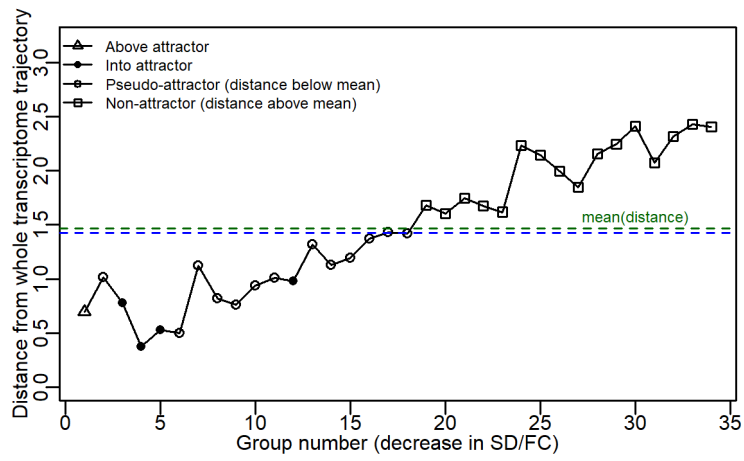

Figure S3D

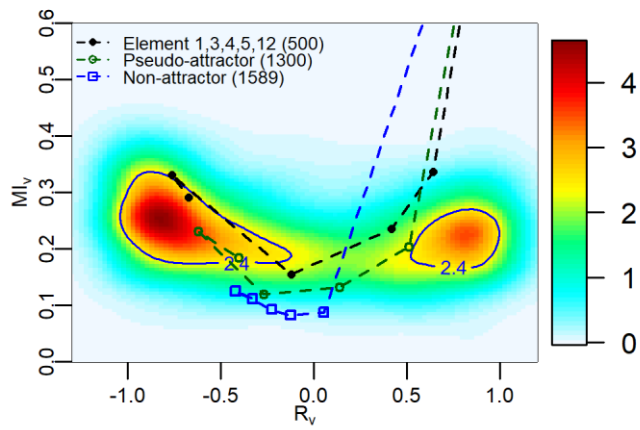

Figure S3E

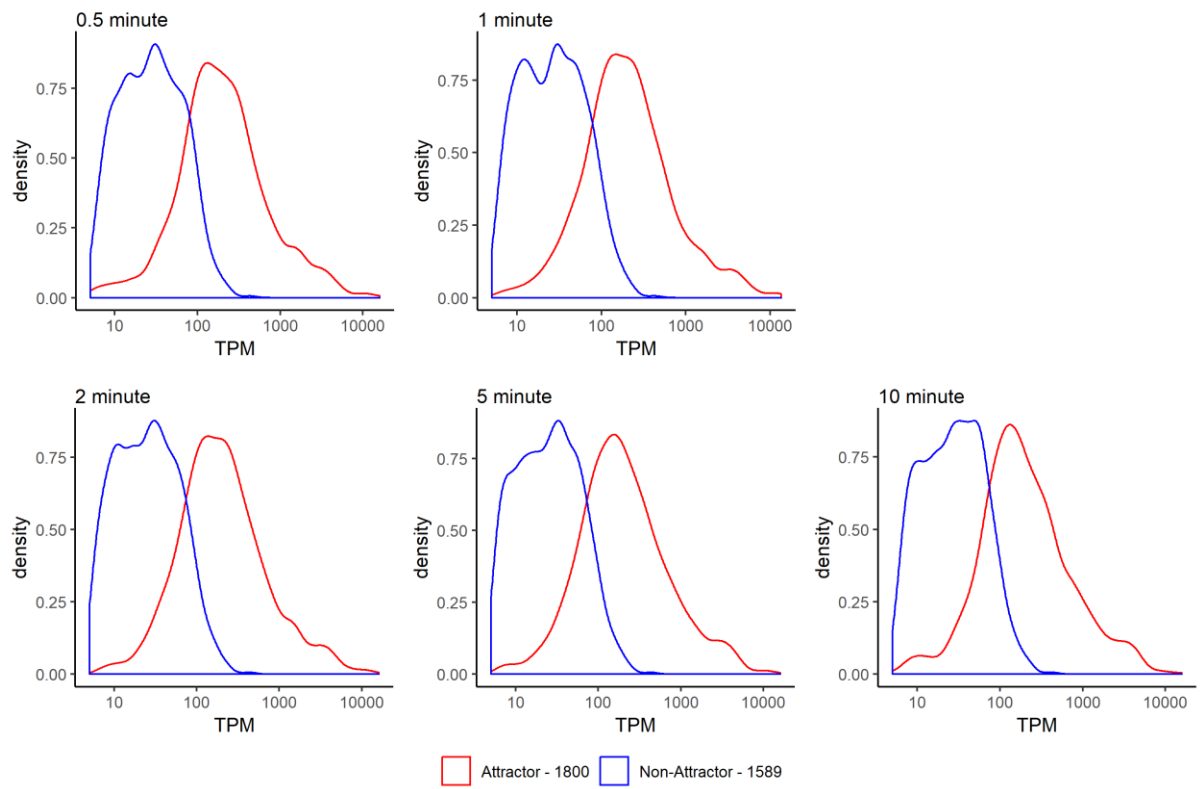

Figure S4A

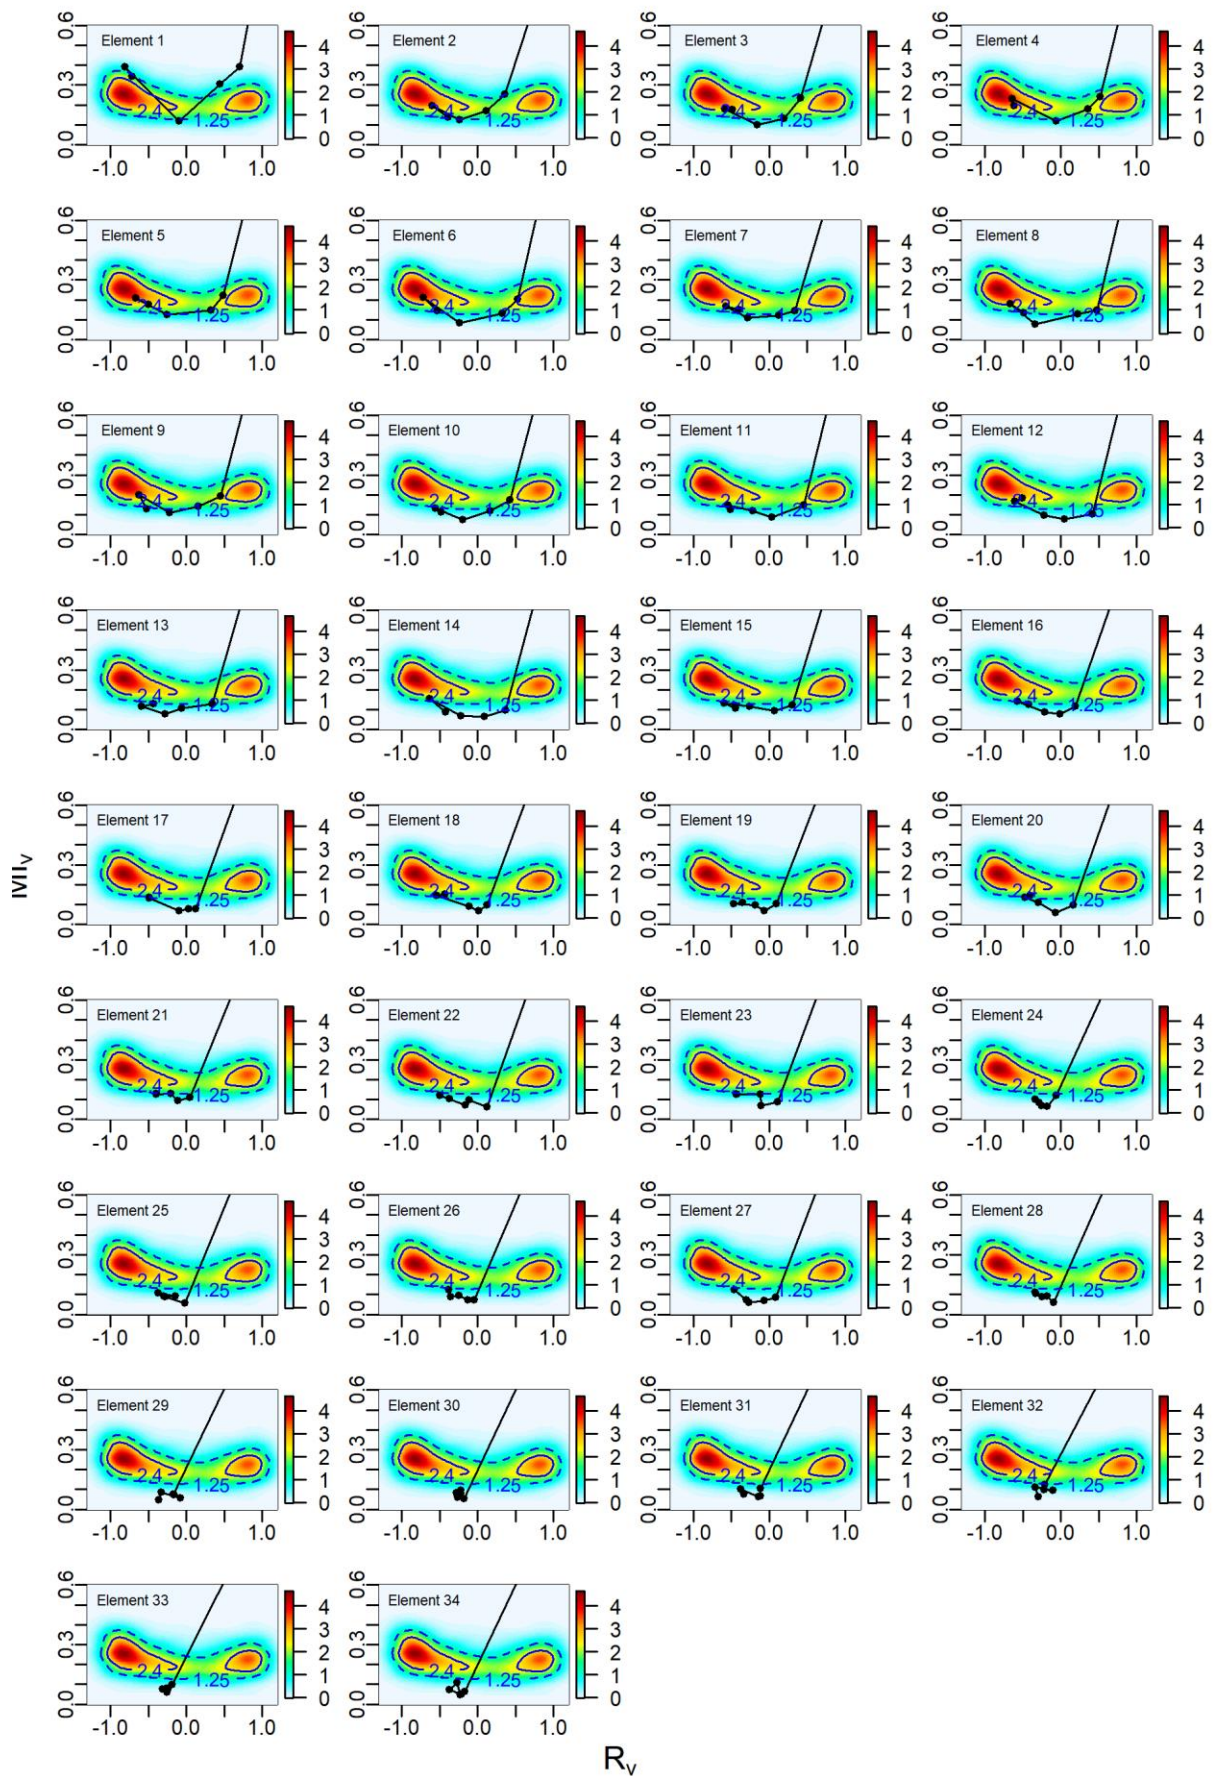



Figure S4B

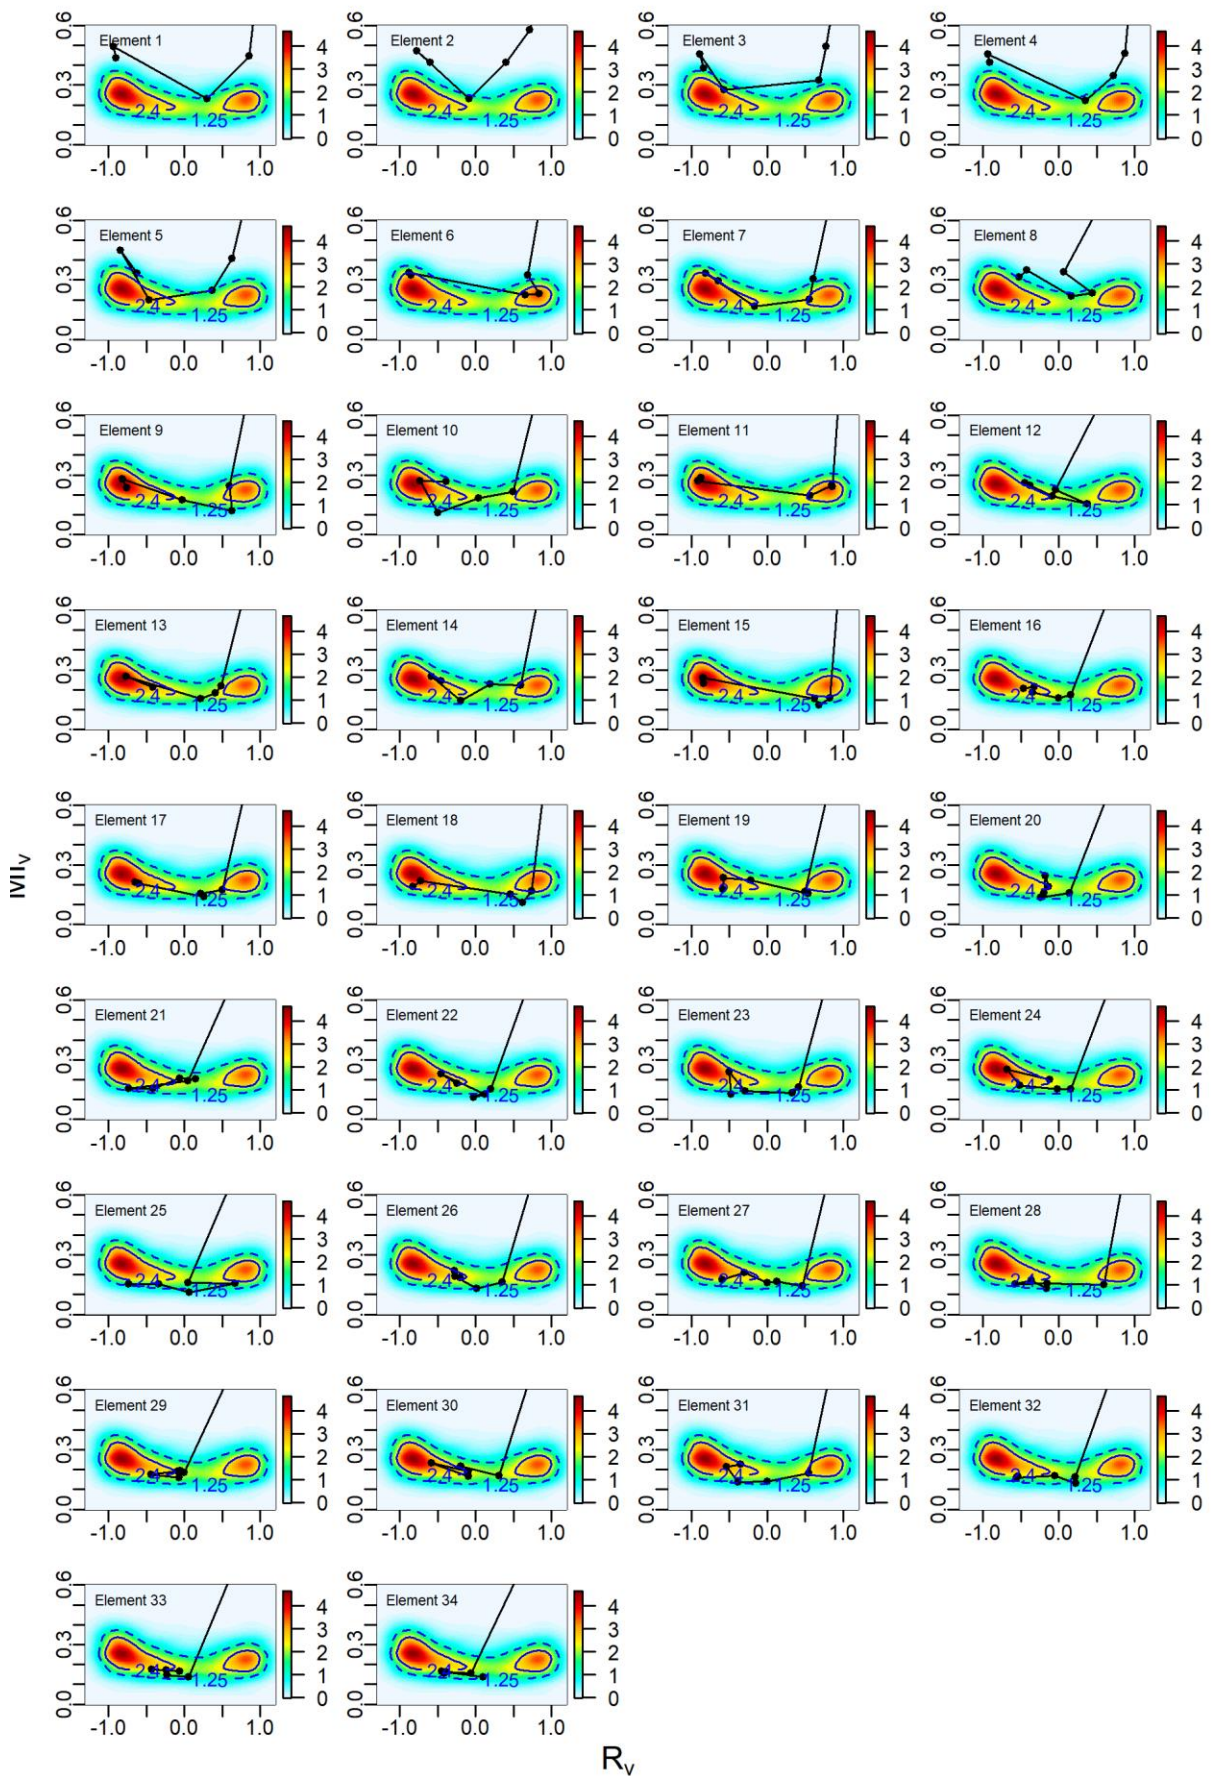

Figure S5A

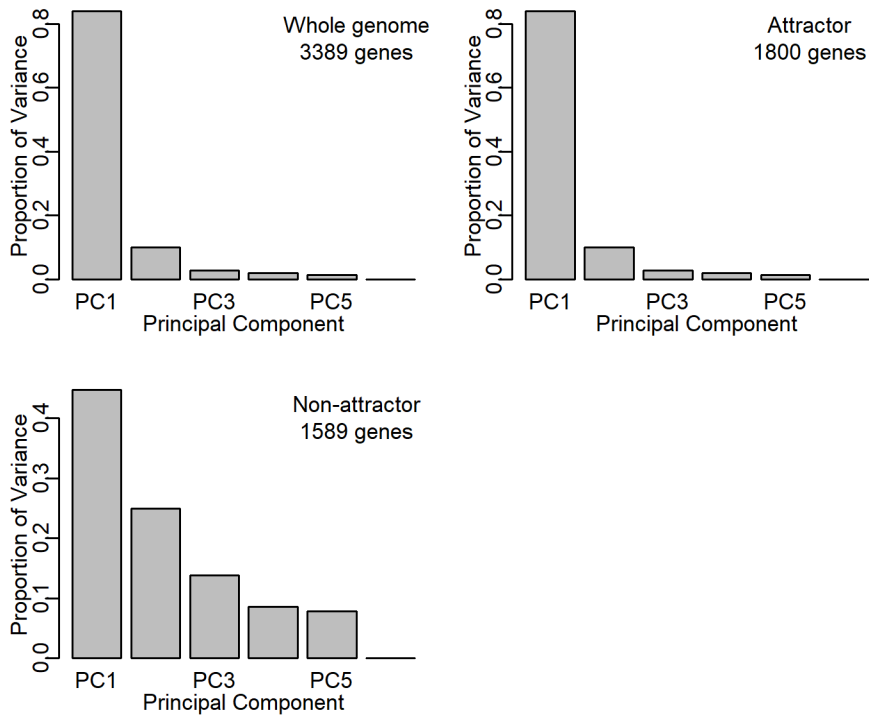

Figure S5B

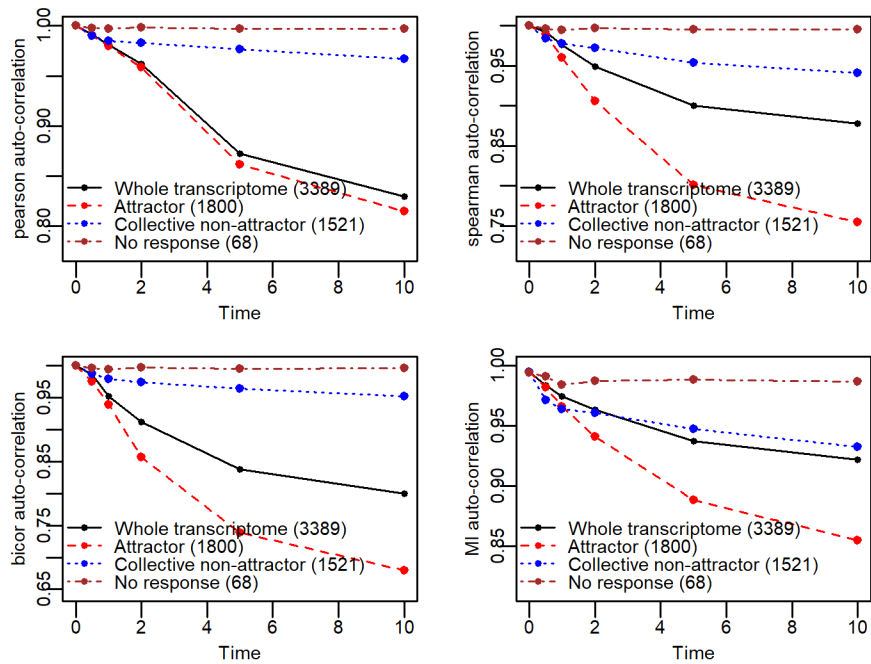



Figure S6A

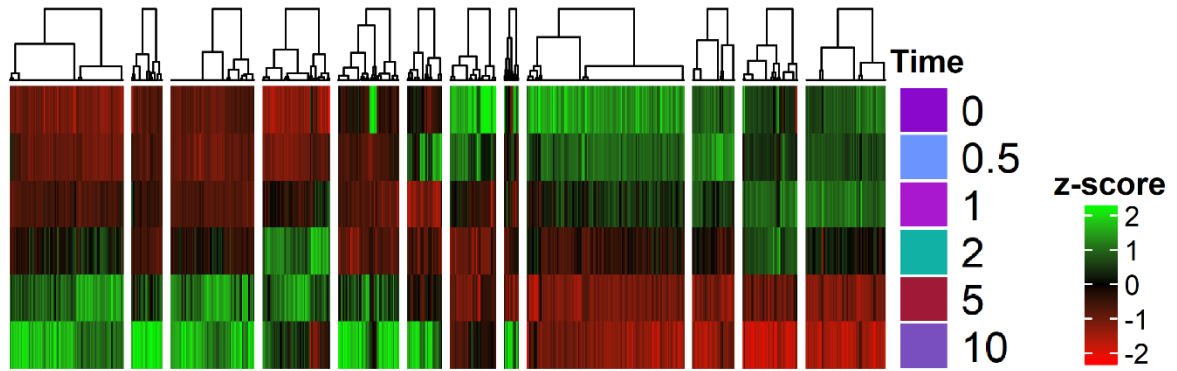

Figure S6B

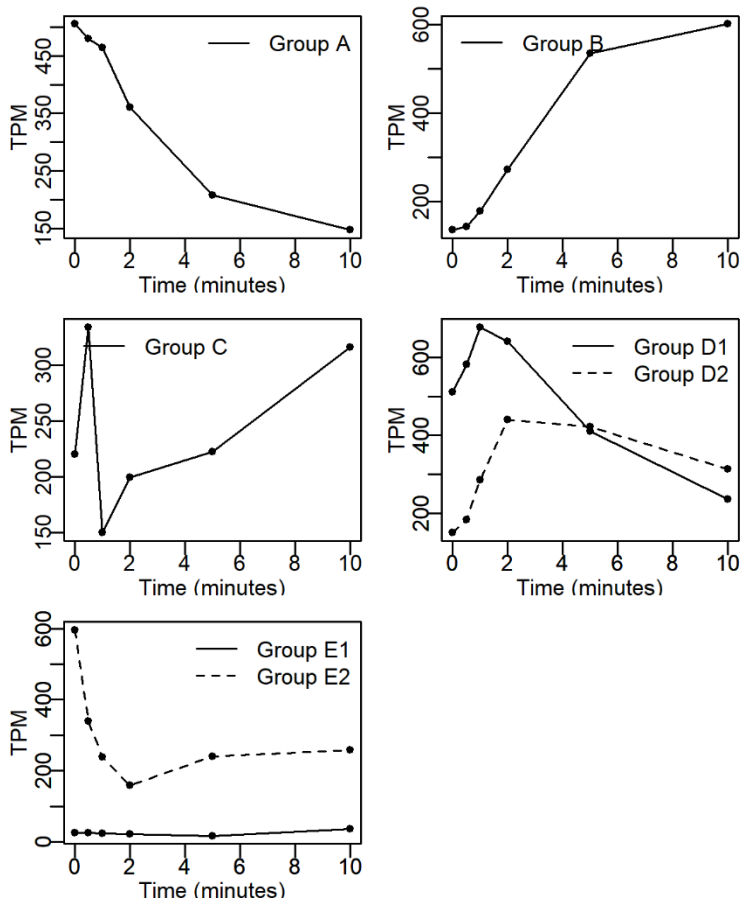

Figure S6C

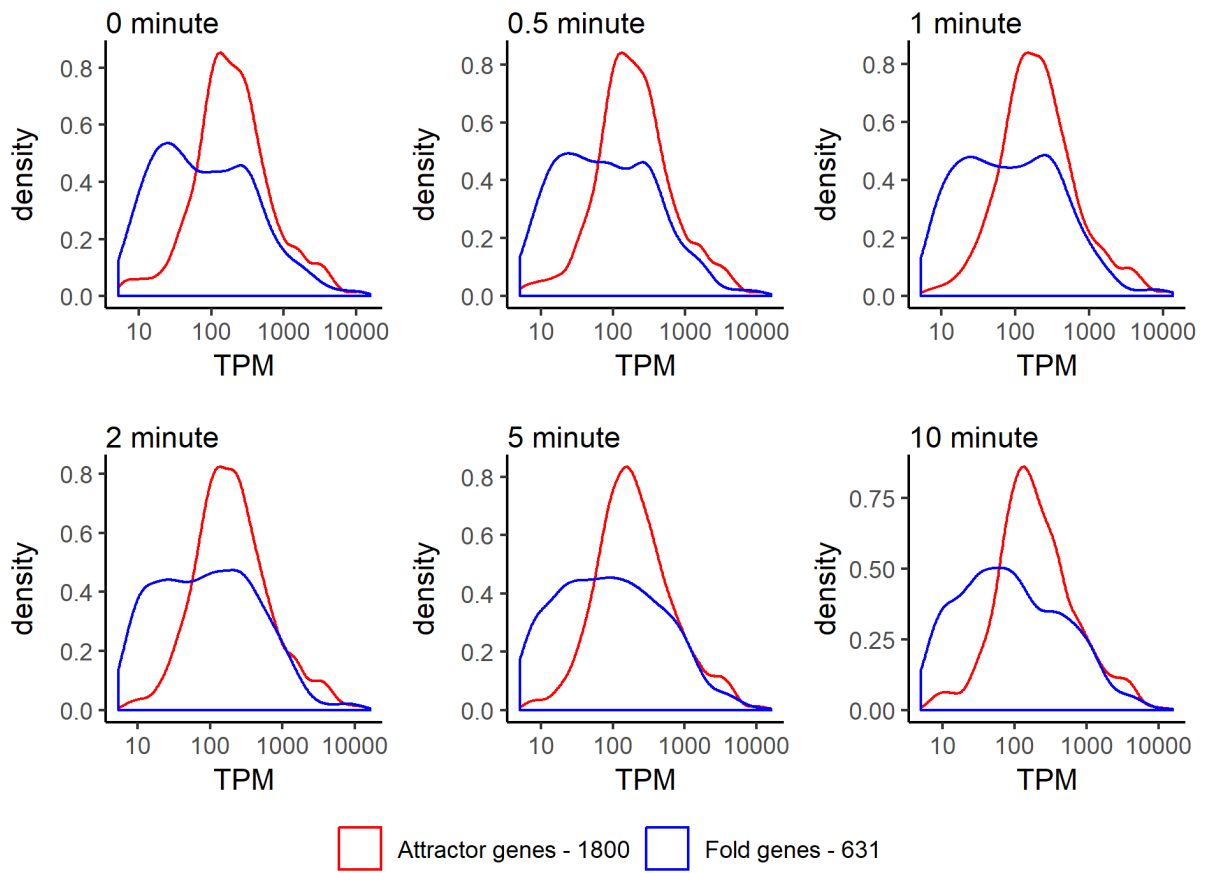

## Supplemental table legend

**Table S1. Akaike Information Criterion (AIC) Values for 3 replicates (denoted as sample a, b, and c) in 6 time points (0, 0.5, 1, 2, 5, 10 minutes).**

**Table S2. Biological processes enriched in the 6 major expression patterns of attractor genes with their associated genes.** (Table S2 is provided in the supplemental Excel file)

**Table S3. Gene ID and their coding protein name for each temporal expression group of attractor genes.** (A) Group A, with 72 uncharacterized genes. (B) Group B, with 61 uncharacterized genes. (C) Group C, with 77 uncharacterized genes. (D) Group D, with 19 uncharacterized genes. (E) Group E, with 33 uncharacterized genes. (F) Group F, with 73 uncharacterized genes. Genes highlighted in yellow have novel or uncharacterized functions. Note: the tRNA and rRNA genes in these groups are marked as unmapped genes in Entrez Gene identifier database during Gene Ontology enrichment analysis. (Table S3 is provided in the supplemental Excel file)

**Table S4. Novel gene ID and their coding protein name for each temporal expression group of attractor genes.** (A) Group A, with 72 uncharacterized genes. (B) Group B, with 61 uncharacterized genes. (C) Group C, with 77 uncharacterized genes. (D) Group D, with 19 uncharacterized genes. (E) Group E, with 33 uncharacterized genes. (F) Group F, with 73 uncharacterized genes. (Table S4 is provided in the supplemental Excel file)

**Table S5: List of 94 refined attractor genes for all groups.** Refined attractor genes have expression over 500TPM and at least 3-fold change between any 2 time points. (Table S5 is provided in the supplemental Excel file)

**Table S6: Gene ID and their coding protein name for non-attractor genes with two-fold expression change genes.** Novel or uncharacterized genes are highlighted in yellow. (Table S6 is provided in the supplemental Excel file)

Table S1

| <b>Data column</b>    | <b>Lognormal</b> | <b>Pareto</b> | <b>Burr</b> | <b>Loglogistic</b> | <b>Weibull</b> | <b>Gamma</b> | <b>min AIC</b> |
|-----------------------|------------------|---------------|-------------|--------------------|----------------|--------------|----------------|
| Sample a - 0 minute   | 49098.75         | 49255.19      | 49215.14    | 49247.69           | 50180.74       | 51374.37     | Lognormal      |
| Sample a - 0.5 minute | 48344.28         | 48551.5       | 48507.93    | 48516.81           | 49039.09       | 50156.55     | Lognormal      |
| Sample a - 1 minute   | 48214.76         | 48424.09      | 48365.63    | 48381.71           | 48876.56       | 50003.22     | Lognormal      |
| Sample a - 2 minute   | 48364.88         | 48566.01      | 48529.36    | 48534.96           | 49078.37       | 50197.62     | Lognormal      |
| Sample a - 5 minute   | 48220.25         | 48449.67      | 48387.86    | 48400.01           | 48866.07       | 49905.46     | Lognormal      |
| Sample a - 10 minute  | 47809.02         | 48025.41      | 47964.63    | 47973.92           | 48494.05       | 49620.65     | Lognormal      |
| Sample b - 0 minute   | 48642.39         | 48836.06      | 48789.4     | 48803.99           | 49292.29       | 50337.54     | Lognormal      |
| Sample b - 0.5 minute | 48491.43         | 48704.59      | 48633.85    | 48657.3            | 49097.76       | 50127.62     | Lognormal      |
| Sample b - 1 minute   | 48841.43         | 49051.21      | 49033.92    | 49034.86           | 49603.09       | 50638.59     | Lognormal      |
| Sample b - 2 minute   | 48526.78         | 48750.51      | 48671.86    | 48693.55           | 49125.86       | 50163.96     | Lognormal      |
| Sample b - 5 minute   | 48473.24         | 48706.49      | 48642.12    | 48656.2            | 49117.31       | 50172.92     | Lognormal      |
| Sample b - 10 minute  | 49269.51         | 49441.38      | 49439.1     | 49443.25           | 50215.4        | 51289.65     | Lognormal      |
| Sample c - 0 minute   | 48257.48         | 48423.97      | 48409.13    | 48412.21           | 49017.74       | 50139.47     | Lognormal      |
| Sample c - 0.5 minute | 48983.88         | 49168.25      | 49156.31    | 49157.84           | 49753.5        | 50846.05     | Lognormal      |
| Sample c - 1 minute   | 48741.22         | 48971.46      | 48909.27    | 48926.51           | 49384.77       | 50424.94     | Lognormal      |
| Sample c - 2 minute   | 48488.08         | 48693.12      | 48650.92    | 48661.23           | 49186.1        | 50327.67     | Lognormal      |
| Sample c - 5 minute   | 48799.45         | 48976.71      | 48976.61    | 48974.65           | 49636.51       | 50734.56     | Lognormal      |
| Sample c - 10 minute  | 48829.55         | 49006.02      | 49002       | 49000.89           | 49646.14       | 50797.74     | Lognormal      |
